# Supplementary material for: A hydrophobic anchor mechanism defines a deacetylase family that suppresses host response against YopJ effectors
Source: PubMed Central journal article supplement (PMC5736716; doi:10.1038/s41467-017-02347-w), 2017-12-19
Supplement: 41467_2017_2347_MOESM1_ESM.pdf [file 41467_2017_2347_MOESM1_ESM.pdf]

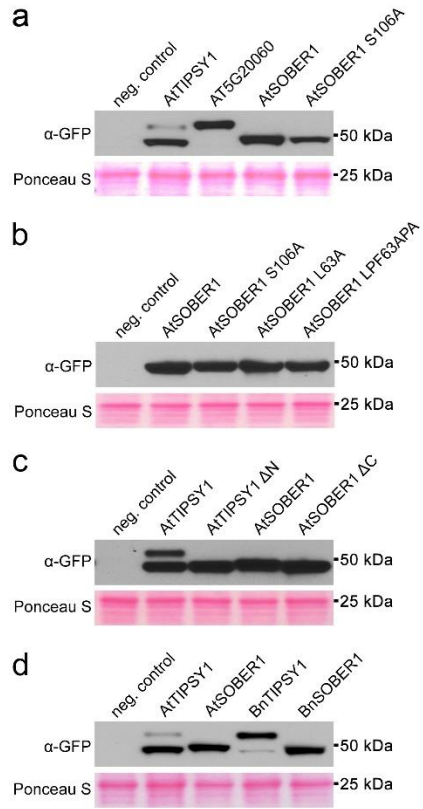

**Supplementary Figure 1** | Western blot analysis of proteins expressed in *N. benthamiana* leaves as shown in **Fig. 2**, **Fig. 3**, **Fig. 4** and **Fig. 5**.

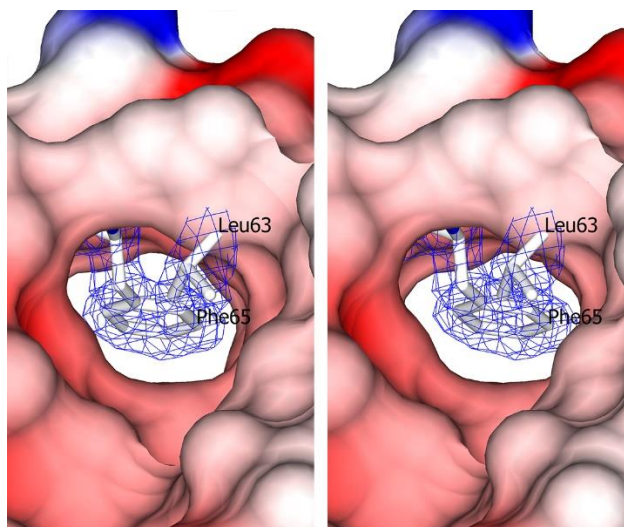

**Supplementary Figure 2** | Stereo view of the SOBER1 tunnel with anchor residue Phe65 and residue Leu63 blocking the tunnel entrance. Electron density of Leu63 and Phe65 is shown as 2FOFCWT map contoured at  $1 \sigma$ .

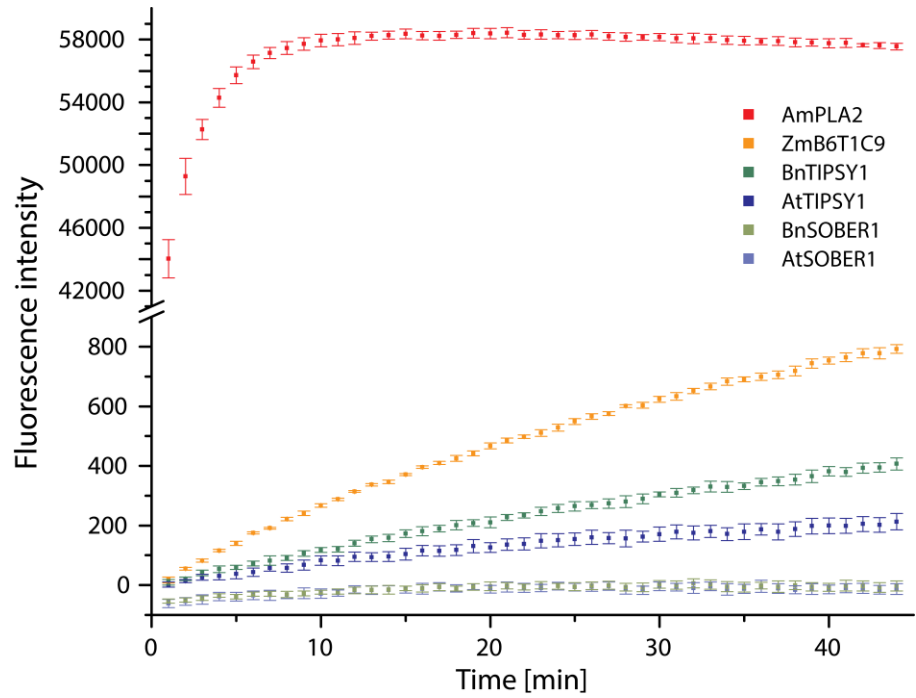

**Supplementary Figure 3 |** SOBER1 does not display detectable phospholipase A<sub>2</sub> activity.

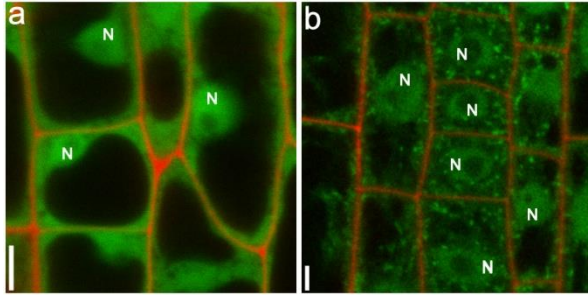

**Supplementary Figure 4** | YFP signals of transgenic *Arabidopsis* seedlings expressing *AtSOBER1:HA:YFP:HA* (a) or *AtTIPSY1:HA:YFP:HA* (b) were detected in nuclei (N) of roots cells. YFP signals are shown in green while propidium iodide is depicted in red. Scale bar = 5  $\mu$ m.

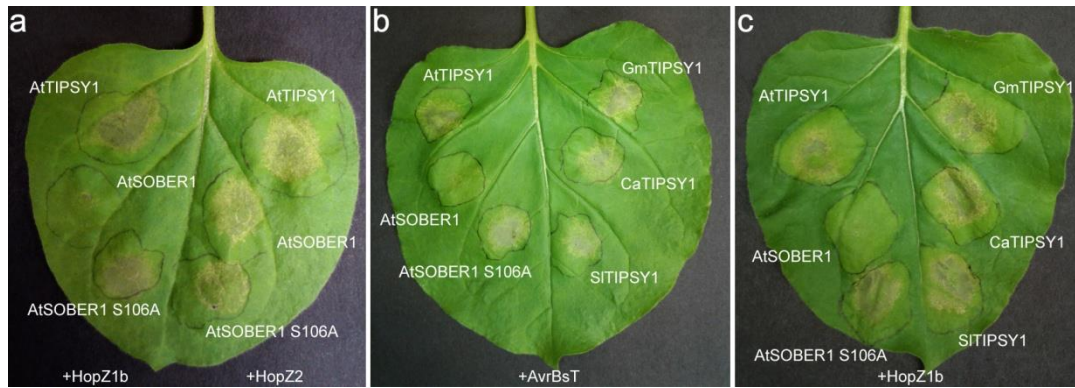

**Supplementary Figure 5** | HR elicited by HopZ1b is suppressed by AtSOBER1. **(a)** *Arabidopsis* SOBER1 and TIPSY1 were co-expressed with *hopZ1b* or *hopZ2* from *P. syringae*. **(b)** AtSOBER1 and TIPSY1 from *Arabidopsis thaliana*, *Glycine max*, *Capsicum annuum* as well as *Solanum lycopersicum* were co-expressed with *avrBsT*. **(c)** AtSOBER1 and TIPSY1 from *Arabidopsis thaliana*, *Glycine max*, *Capsicum annuum* as well as *Solanum lycopersicum* were co-expressed with *hopZ1b*.

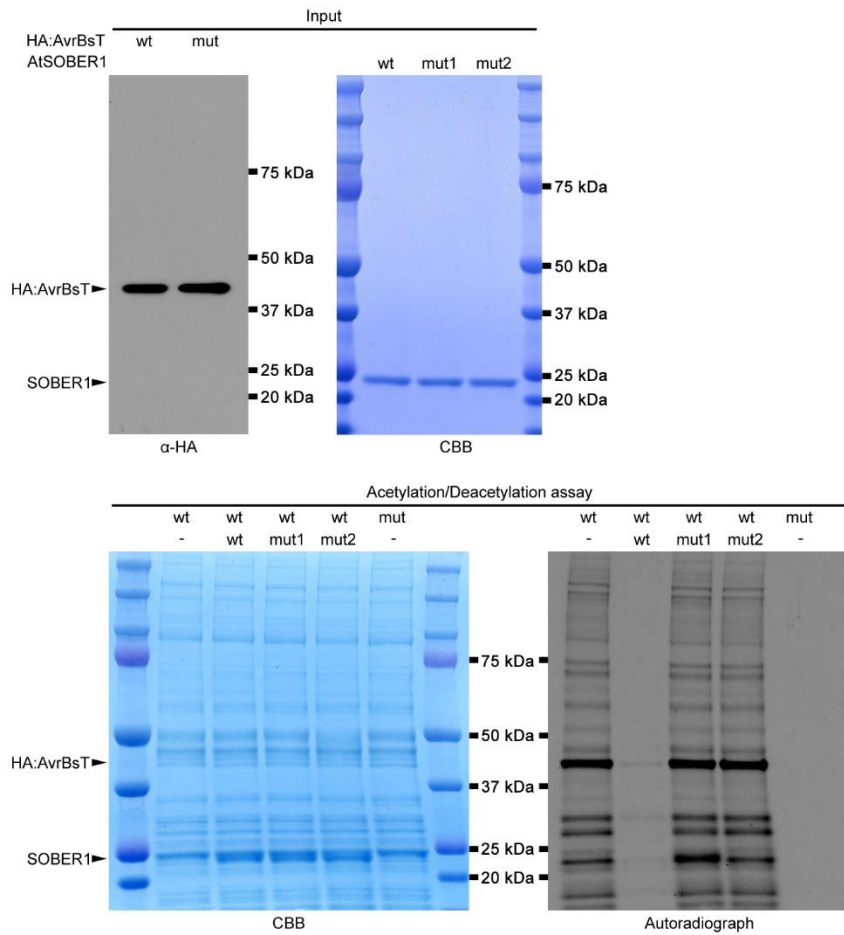

**Supplementary Figure 6 |** SOBER1 is a protein deacetylase. HA:AvrBsT (wild type and C222A mutant variant) was *in vitro* translated, affinity enriched and incubated with [ $^{14}$ C]-acetyl coenzyme A and inositol hexakisphosphate. Subsequent addition of wild type AtSOBER1 deacetylated AvrBsT and other acetylated proteins. These proteins derived from the *in vitro* transcription and translation system and were acetylated by AvrBsT. AtSOBER1 mutant variants (mut1: H192A, mut2: S106A H192A) showed no deacetylation activity.

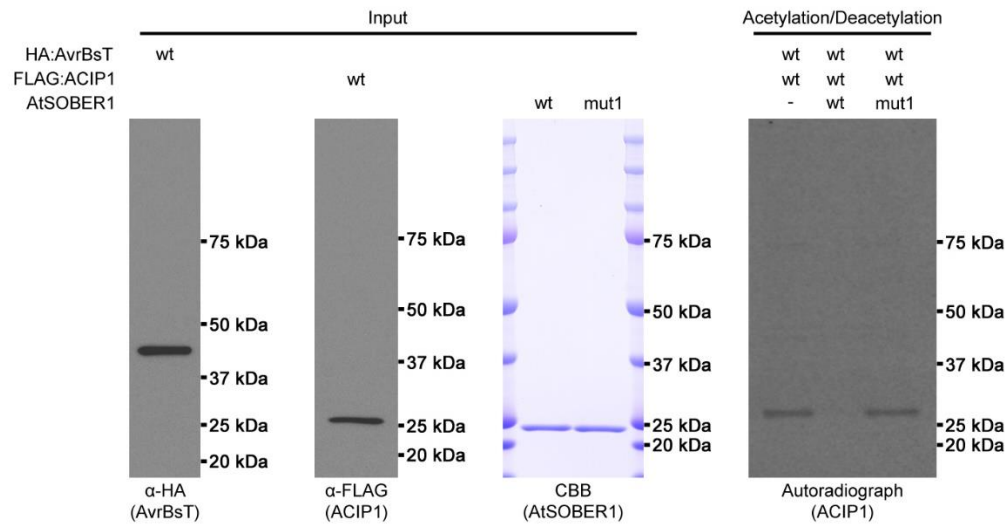

**Supplementary Figure 7** | Uncropped scans of western blots, CBB gel and autoradiograph shown in **Fig. 6b**.

**Supplementary Table 1 | Kinetic parameters of proteins on different pNP esters**

|                                  | AtSOBER1                       | AtSOBER1 L63A                  | AtSOBER1 F65L                  | AtTIPSY1                       | AtTIPSY1 L110F                 | BnSOBER1                       | BnTIPSY1                       | ZmB6T1C9/ZmAPT2                | Ca12g01000                     | Sl460409648                    |
|----------------------------------|--------------------------------|--------------------------------|--------------------------------|--------------------------------|--------------------------------|--------------------------------|--------------------------------|--------------------------------|--------------------------------|--------------------------------|
| <b>pNP acetate (C2:0)</b>        |                                |                                |                                |                                |                                |                                |                                |                                |                                |                                |
| $K_M$ [M]                        | $1.58 \pm 0.11 \times 10^{-4}$ | $6.39 \pm 0.22 \times 10^{-3}$ | $3.12 \pm 0.44 \times 10^{-4}$ | $1.75 \pm 0.18 \times 10^{-3}$ | $1.75 \pm 0.33 \times 10^{-3}$ | $7.53 \pm 0.28 \times 10^{-5}$ | $1.19 \pm 0.09 \times 10^{-3}$ | $1.72 \pm 0.43 \times 10^{-3}$ | $2.39 \pm 0.05 \times 10^{-3}$ | $1.43 \pm 0.27 \times 10^{-3}$ |
| $k_{cat}$ [ $s^{-1}$ ]           | $1.95 \pm 0.04 \times 10^2$    | $3.75 \pm 0.09 \times 10^1$    | $1.88 \pm 0.23 \times 10^2$    | $7.89 \pm 0.27 \times 10^2$    | $4.82 \pm 0.32 \times 10^2$    | $7.11 \pm 0.09 \times 10^1$    | $6.34 \pm 0.15 \times 10^2$    | $5.27 \pm 0.46 \times 10^2$    | $1.29 \pm 0.01 \times 10^2$    | $2.32 \pm 0.16 \times 10^2$    |
| $k_{cat}/K_M$ [ $s^{-1}M^{-1}$ ] | $1.24 \pm 0.09 \times 10^6$    | $5.86 \pm 0.20 \times 10^3$    | $6.04 \pm 0.84 \times 10^5$    | $4.51 \pm 0.45 \times 10^5$    | $2.76 \pm 0.52 \times 10^5$    | $9.45 \pm 0.35 \times 10^5$    | $2.32 \pm 0.37 \times 10^5$    | $3.07 \pm 0.77 \times 10^5$    | $5.40 \pm 0.11 \times 10^4$    | $1.62 \pm 0.31 \times 10^5$    |
| <b>pNP butyrate (C4:0)</b>       |                                |                                |                                |                                |                                |                                |                                |                                |                                |                                |
| $K_M$ [M]                        | $2.27 \pm 0.11 \times 10^{-4}$ | $2.96 \pm 0.15 \times 10^{-5}$ | $4.80 \pm 0.23 \times 10^{-5}$ | $5.03 \pm 0.41 \times 10^{-4}$ | $4.44 \pm 0.82 \times 10^{-4}$ | $2.04 \pm 0.33 \times 10^{-5}$ | $4.70 \pm 0.55 \times 10^{-4}$ | $5.89 \pm 1.26 \times 10^{-4}$ | $8.88 \pm 0.93 \times 10^{-5}$ | $1.93 \pm 0.28 \times 10^{-4}$ |
| $k_{cat}$ [ $s^{-1}$ ]           | $9.64 \pm 0.20 \times 10^0$    | $1.64 \pm 0.03 \times 10^0$    | $1.10 \pm 0.18 \times 10^1$    | $2.65 \pm 0.08 \times 10^2$    | $1.00 \pm 0.07 \times 10^1$    | $2.93 \pm 0.16 \times 10^0$    | $2.22 \pm 0.08 \times 10^2$    | $4.22 \pm 0.40 \times 10^2$    | $8.82 \pm 0.26 \times 10^1$    | $2.18 \pm 0.10 \times 10^2$    |
| $k_{cat}/K_M$ [ $s^{-1}M^{-1}$ ] | $4.25 \pm 0.22 \times 10^4$    | $5.54 \pm 0.23 \times 10^4$    | $2.30 \pm 0.37 \times 10^5$    | $5.10 \pm 0.41 \times 10^5$    | $2.27 \pm 0.41 \times 10^4$    | $1.44 \pm 0.23 \times 10^5$    | $4.71 \pm 0.55 \times 10^5$    | $7.17 \pm 1.51 \times 10^5$    | $9.94 \pm 0.99 \times 10^5$    | $1.13 \pm 0.16 \times 10^6$    |
| <b>pNP valerate (C5:0)</b>       |                                |                                |                                |                                |                                |                                |                                |                                |                                |                                |
| $K_M$ [M]                        | $3.27 \pm 0.27 \times 10^{-4}$ | $4.00 \pm 0.11 \times 10^{-6}$ | $1.52 \pm 0.15 \times 10^{-4}$ | $3.07 \pm 0.29 \times 10^{-4}$ | $1.47 \pm 0.15 \times 10^{-4}$ | $7.83 \pm 2.65 \times 10^{-5}$ | $3.11 \pm 0.32 \times 10^{-4}$ | $5.30 \pm 0.46 \times 10^{-4}$ | $1.38 \pm 0.18 \times 10^{-4}$ | $1.98 \pm 0.35 \times 10^{-4}$ |
| $k_{cat}$ [ $s^{-1}$ ]           | $9.01 \pm 0.25 \times 10^0$    | $5.01 \pm 0.03 \times 10^0$    | $1.42 \pm 0.06 \times 10^1$    | $6.46 \pm 0.39 \times 10^1$    | $1.09 \pm 0.05 \times 10^1$    | $1.59 \pm 0.31 \times 10^0$    | $1.19 \pm 0.05 \times 10^2$    | $4.41 \pm 0.20 \times 10^2$    | $3.49 \pm 0.13 \times 10^1$    | $1.02 \pm 0.07 \times 10^2$    |
| $k_{cat}/K_M$ [ $s^{-1}M^{-1}$ ] | $2.76 \pm 0.22 \times 10^4$    | $1.25 \pm 0.03 \times 10^6$    | $9.37 \pm 0.94 \times 10^4$    | $2.10 \pm 0.20 \times 10^5$    | $7.39 \pm 0.74 \times 10^4$    | $2.03 \pm 0.69 \times 10^4$    | $3.81 \pm 0.38 \times 10^5$    | $8.31 \pm 0.07 \times 10^5$    | $2.51 \pm 0.31 \times 10^5$    | $5.13 \pm 0.91 \times 10^5$    |
| <b>pNP hexanoate (C6:0)</b>      | not determinable               | not determinable               |                                |                                |                                | not determinable               |                                |                                | not determinable               |                                |
| $K_M$ [M]                        |                                |                                | $3.50 \pm 0.54 \times 10^{-5}$ | $4.75 \pm 0.40 \times 10^{-4}$ | $1.65 \pm 0.15 \times 10^{-4}$ |                                | $1.22 \pm 0.10 \times 10^{-4}$ | $1.21 \pm 0.08 \times 10^{-4}$ |                                | $9.64 \pm 0.96 \times 10^{-5}$ |
| $k_{cat}$ [ $s^{-1}$ ]           |                                |                                | $5.21 \pm 0.27 \times 10^0$    | $3.64 \pm 0.18 \times 10^2$    | $6.28 \pm 0.21 \times 10^0$    |                                | $1.55 \pm 0.05 \times 10^1$    | $1.39 \pm 0.05 \times 10^2$    |                                | $4.24 \pm 0.43 \times 10^0$    |
| $k_{cat}/K_M$ [ $s^{-1}M^{-1}$ ] |                                |                                | $1.49 \pm 0.22 \times 10^5$    | $7.66 \pm 0.64 \times 10^5$    | $3.80 \pm 0.34 \times 10^4$    |                                | $1.26 \pm 0.10 \times 10^5$    | $1.59 \pm 0.11 \times 10^6$    |                                | $4.40 \pm 0.44 \times 10^4$    |
| <b>pNP octanoate (C8:0)</b>      | not determinable               | not determinable               | not determinable               | not determinable               | not determinable               | not determinable               | not determinable               |                                | not determinable               | not determinable               |
| $K_M$ [M]                        |                                |                                |                                |                                |                                |                                |                                | $1.19 \pm 0.11 \times 10^{-4}$ |                                |                                |
| $k_{cat}$ [ $s^{-1}$ ]           |                                |                                |                                |                                |                                |                                |                                | $1.53 \pm 0.06 \times 10^2$    |                                |                                |
| $k_{cat}/K_M$ [ $s^{-1}M^{-1}$ ] |                                |                                |                                |                                |                                |                                |                                | $1.28 \pm 0.24 \times 10^6$    |                                |                                |
| <b>pNP decanoate (C10:0)</b>     | not determinable               | not determinable               | not determinable               | not determinable               | not determinable               | not determinable               | not determinable               |                                | not determinable               | not determinable               |
| $K_M$ [M]                        |                                |                                |                                |                                |                                |                                |                                | $6.56 \pm 0.44 \times 10^{-5}$ |                                |                                |
| $k_{cat}$ [ $s^{-1}$ ]           |                                |                                |                                |                                |                                |                                |                                | $4.88 \pm 0.12 \times 10^1$    |                                |                                |
| $k_{cat}/K_M$ [ $s^{-1}M^{-1}$ ] |                                |                                |                                |                                |                                |                                |                                | $7.43 \pm 0.49 \times 10^5$    |                                |                                |
| <b>pNP dodecanoate (C12:0)</b>   | not determinable               | not determinable               | not determinable               | not determinable               | not determinable               | not determinable               | not determinable               |                                | not determinable               | not determinable               |
| $K_M$ [M]                        |                                |                                |                                |                                |                                |                                |                                | $6.40 \pm 0.69 \times 10^{-5}$ |                                |                                |
| $k_{cat}$ [ $s^{-1}$ ]           |                                |                                |                                |                                |                                |                                |                                | $1.07 \pm 0.39 \times 10^1$    |                                |                                |
| $k_{cat}/K_M$ [ $s^{-1}M^{-1}$ ] |                                |                                |                                |                                |                                |                                |                                | $1.68 \pm 0.18 \times 10^5$    |                                |                                |
| <b>pNP myristate (C14:0)</b>     | not determinable               | not determinable               | not determinable               | not determinable               | not determinable               | not determinable               | not determinable               |                                | not determinable               | not determinable               |
| $K_M$ [M]                        |                                |                                |                                |                                |                                |                                |                                | $3.87 \pm 0.33 \times 10^{-5}$ |                                |                                |
| $k_{cat}$ [ $s^{-1}$ ]           |                                |                                |                                |                                |                                |                                |                                | $1.66 \pm 0.07 \times 10^0$    |                                |                                |
| $k_{cat}/K_M$ [ $s^{-1}M^{-1}$ ] |                                |                                |                                |                                |                                |                                |                                | $4.30 \pm 0.37 \times 10^4$    |                                |                                |
| <b>pNP palmitate (C16:0)</b>     | not determinable               | not determinable               | not determinable               | not determinable               | not determinable               | not determinable               | not determinable               |                                | not determinable               | not determinable               |
| $K_M$ [M]                        |                                |                                |                                |                                |                                |                                |                                | $9.14 \pm 0.10 \times 10^{-6}$ |                                |                                |
| $k_{cat}$ [ $s^{-1}$ ]           |                                |                                |                                |                                |                                |                                |                                | $6.49 \pm 0.06 \times 10^1$    |                                |                                |
| $k_{cat}/K_M$ [ $s^{-1}M^{-1}$ ] |                                |                                |                                |                                |                                |                                |                                | $6.49 \pm 0.02 \times 10^4$    |                                |                                |



**Supplementary Table 2 | List of primers**

| <b>Oligos for cloning</b>                                                                                                                                                                                                                                                                                                                                                                                     |                                                             |
|---------------------------------------------------------------------------------------------------------------------------------------------------------------------------------------------------------------------------------------------------------------------------------------------------------------------------------------------------------------------------------------------------------------|-------------------------------------------------------------|
| All constructs for heterologous expression in <i>E. coli</i> were synthesized as codon-optimized genes with Gateway cloning sites included so that they could be used without performing PCR. Additionally, coding sequences of <i>BnSOBER1</i> , <i>BnTIPSY1</i> , <i>CaTIPSY1</i> , <i>GmTIPSY1</i> , <i>SITIPSY1</i> , <i>hopZ1b</i> and <i>hopZ2</i> were synthesized with Gateway cloning sites as well. |                                                             |
| <i>In planta</i> experiments:                                                                                                                                                                                                                                                                                                                                                                                 |                                                             |
| <i>ACIP1</i> 3'                                                                                                                                                                                                                                                                                                                                                                                               | GGGGACCACCTTTGTACAAGAAAGCTGGGTCTCATCAGTGTATAGAATCTATGTTCTTG |
| <i>ACIP1</i> 5'                                                                                                                                                                                                                                                                                                                                                                                               | GGGGACAAGTTTGTACAAAAAAGCAGGCTCCATGAAGGAGATGCAGGCAATAG       |
| <i>At5g20060</i> 3'                                                                                                                                                                                                                                                                                                                                                                                           | GGGGACCACCTTTGTACAAGAAAGCTGGGTTACCTTCGAGGCTGAGCGTGG         |
| <i>At5g20060</i> 5'                                                                                                                                                                                                                                                                                                                                                                                           | GGGGACAAGTTTGTACAAAAAAGCAGGCTATGAGTATCTCCGGTGCTGC           |
| <i>AtSOBER1</i> ΔC 3'                                                                                                                                                                                                                                                                                                                                                                                         | GGGGACCACCTTTGTACAAGAAAGCTGGGTTACAAGTAGACGACGAACCTTTC       |
| <i>AtSOBER1</i> 3'                                                                                                                                                                                                                                                                                                                                                                                            | GGGGACCACCTTTGTACAAGAAAGCTGGGTTGTGGAACATTTCTTTAAGACAATT     |
| <i>AtSOBER1</i> 5'                                                                                                                                                                                                                                                                                                                                                                                            | GGGGACAAGTTTGTACAAAAAAGCAGGCTATGGCTCGAACTTTCATCTTGTGG       |
| <i>AtTIPSY1</i> ΔN 5'                                                                                                                                                                                                                                                                                                                                                                                         | GGGGACAAGTTTGTACAAAAAAGCAGGCTATGGCTCGAACTTTCATCTTATGG       |
| <i>AtTIPSY1</i> 3'                                                                                                                                                                                                                                                                                                                                                                                            | GGGGACCACCTTTGTACAAGAAAGCTGGGTTTGAAGAAGAAGAAGAGCTCTGC       |
| <i>AtTIPSY1</i> 5'                                                                                                                                                                                                                                                                                                                                                                                            | GGGGACAAGTTTGTACAAAAAAGCAGGCTATGCGAACAAAGTAGACTGAAGAAGC     |
| <i>avrBsT</i> 3'                                                                                                                                                                                                                                                                                                                                                                                              | GGGGACCACCTTTGTACAAGAAAGCTGGGTCTAAGACTCAATAGTCTTTCTGATC     |
| <i>avrBsT</i> 5'                                                                                                                                                                                                                                                                                                                                                                                              | GGGGACAAGTTTGTACAAAAAAGCAGGCTCCATGAAGAACTTCATGAGATCAC       |
| <b>Mutagenesis oligos</b>                                                                                                                                                                                                                                                                                                                                                                                     |                                                             |
| Heterologous expression in <i>E. coli</i> :                                                                                                                                                                                                                                                                                                                                                                   |                                                             |
| <i>AtSOBER1</i> F65L                                                                                                                                                                                                                                                                                                                                                                                          | GCTGGTTTGATGTGCCGGAGCTGCCGCTGAAAGTGGGCAGCCCGATTGACGAGAG     |
| <i>AtSOBER1</i> H192A                                                                                                                                                                                                                                                                                                                                                                                         | CAAGGCCTATCCGGGCCTGGGCGCGAGCATTAGCAATAAAGAGCTG              |
| <i>AtSOBER1</i> S106A                                                                                                                                                                                                                                                                                                                                                                                         | GAGCTGGTTTGATATTCCGGAAGTCCGTTTACCGCAGGCAGCCCGAAAGATGAGAGTAG |
| <i>AtSOBER1</i> L63A                                                                                                                                                                                                                                                                                                                                                                                          | GCTGGTTTGATGTGCCGGAGGCGCCGTTTAAAGTGGGCAGCCC                 |
| <i>AtTIPSY1</i> L110F                                                                                                                                                                                                                                                                                                                                                                                         | GGAAAACGTGTTTCATCTGCGGCCTGGCGCAGGGTGGTGCACCTGACCCTGGCAAG    |
| <i>In planta</i> experiments:                                                                                                                                                                                                                                                                                                                                                                                 |                                                             |
| <i>AtSOBER1</i> L63A                                                                                                                                                                                                                                                                                                                                                                                          | GGTTTGACGTTCTCTGAAGCTCCTTTTAAAGTGGGC                        |
| <i>AtSOBER1</i> LPF63APA                                                                                                                                                                                                                                                                                                                                                                                      | GGTTTGACGTTCTCTGAAGCTCCTGCTAAAGTGGGCTCTCCAATTGATG           |
| <i>AtSOBER1</i> S106A                                                                                                                                                                                                                                                                                                                                                                                         | CGTGTATCTGTGGATTAGCTCAAGGAGGAGCATTAAACC                     |
| <i>avrBsT</i> C222A                                                                                                                                                                                                                                                                                                                                                                                           | GCTCAGAAGTCTCTTTTGTATGCTGTTATTTTTCTTTGAACATG                |
